# Supplementary material for: Manual acupuncture versus sham acupuncture and usual care for prophylaxis of episodic migraine without aura: multicentre, randomised clinical trial
Source: PubMed Central journal article supplement — BMJ. 2020 Mar 25;368:m697. doi: 10.1136/bmj.m697 (PMC7249245; doi:10.1136/bmj.m697), 2020-03-25
Supplement: xus053060.ww2.pdf [file xus053060.ww2.pdf]

**Figure 1. Acupuncture Ritual**

**We set up standardized ritual operations as follows:**

**Step 1: The patient is guided to a separate, quiet room. An acupuncturist meets the patient and informs him/her to receive a 30-minute duration of acupuncture treatment.**

*“Hello! I will give you a 30-minute duration of acupuncture treatment. Here are the acupuncture needles I am going to use. The ring and plaster will be used to determine the location of acupuncture points. Now you can rest for a while.”*

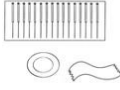

**Step 2: After the patient is completely relaxed, the acupuncturist asks the patient to stay in a fixed position.**

*“Please lie flat on the bed. The acupoints are distributed in the head, hands, and feet.”*



**Manual acupuncture**

*“Please lie prone on the bed and expose your upper back. The acupoints are distributed in shoulders and upper back.”*



**Sham acupuncture**

**Step 3: Start the acupuncture treatment and insert the needle.**

*“Now I’m going to start the acupuncture treatment. Please relax yourself.”*

After sterilization, the acupuncturist places a small plastic ring over the acupuncture point/non-acupuncture point and fixes the ring with plaster, and then inserts the needle through the plaster inside the ring.



**Manual acupuncture**



**Sham acupuncture**

**Step 4: Start the first manual manipulation after all the needles are inserted into the appropriate place.**

*“The needle has been inserted smoothly. Now I will rotate each needle for a while. This is called “acupuncture manipulation”, which is a routine in traditional acupuncture treatment. A total of four times during the treatment will be performed. Now it’s the first time of acupuncture manipulation.”*

The manual manipulation of each needle lasts 10 seconds and is repeated a total of 4 times with an interval of 10 minutes.



**Manual acupuncture**



**Sham acupuncture**

**Step 5: Start the second manual manipulation.**

*“Now it’s the second time of acupuncture manipulation.”*

**Step 6: Start the third manual manipulation.**

*“Now it’s the third time of acupuncture manipulation.”*

**Step 7: Start the fourth manual manipulation and then finish the treatment.**

*“Now it’s the fourth time of acupuncture manipulation. Then the acupuncture treatment is over and I would pull the needle out. (After the needle out, ) Okay, now you can get up. Do you have any discomfort?”*

**Step 8: Assess the average acupuncture sensations of each treatment 10 minutes immediately after treatment.**
